# Supplementary material
Source: PubMed Central journal article supplement (PMC3409756)
Supplement: 1207247109_pnas.201207247SI.pdf [file 1207247109_pnas.201207247SI.pdf]

# Supporting Information

Zhang and Chook 10.1073/pnas.1207247109

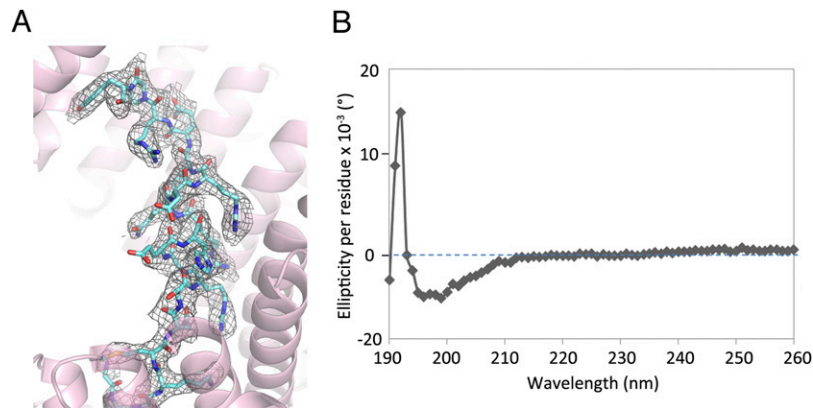

**Fig. S1.** Structure of the atypical PY-NLS of FUS. (A)  $F_o - F_c$  electron density map for the FUS PY-NLS displayed with a  $2.5\sigma$  cutoff. Kap $\beta$ 2 is drawn as a pink cartoon and the PY-NLS is drawn as cyan sticks. (B) The circular dichroism spectrum of the FUS PY-NLS. FUS PY-NLS (20  $\mu$ M) in buffer containing 20 mM Tris, pH 7.5, 100 mM NaCl, 10% (vol/vol) glycerol, and 2 mM  $\beta$ -mercaptoethanol was scanned at 25 °C from 190 nm to 260 nm with five repeats. The buffer background was subtracted to generate the final spectrum.

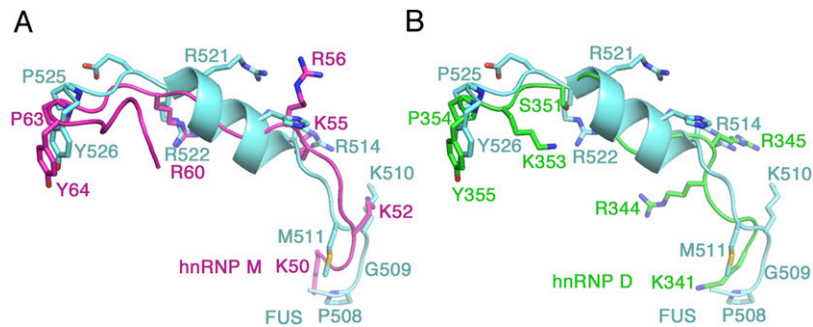

**Fig. S2.** Structure of the atypical PY-NLS of FUS. Kap $\beta$ 2 residues 297–823 for Kap $\beta$ 2-PY NLS complexes are superimposed. (A) Details of the superposition shown to compare PY-NLSs of FUS (cyan; PDB ID 4FDD) and hnRNP M (magenta; PDB ID 2OT8). (B) Details of the superposition to compare PY-NLSs of FUS and hnRNP D NLS (green; PDB ID 2Z5N).

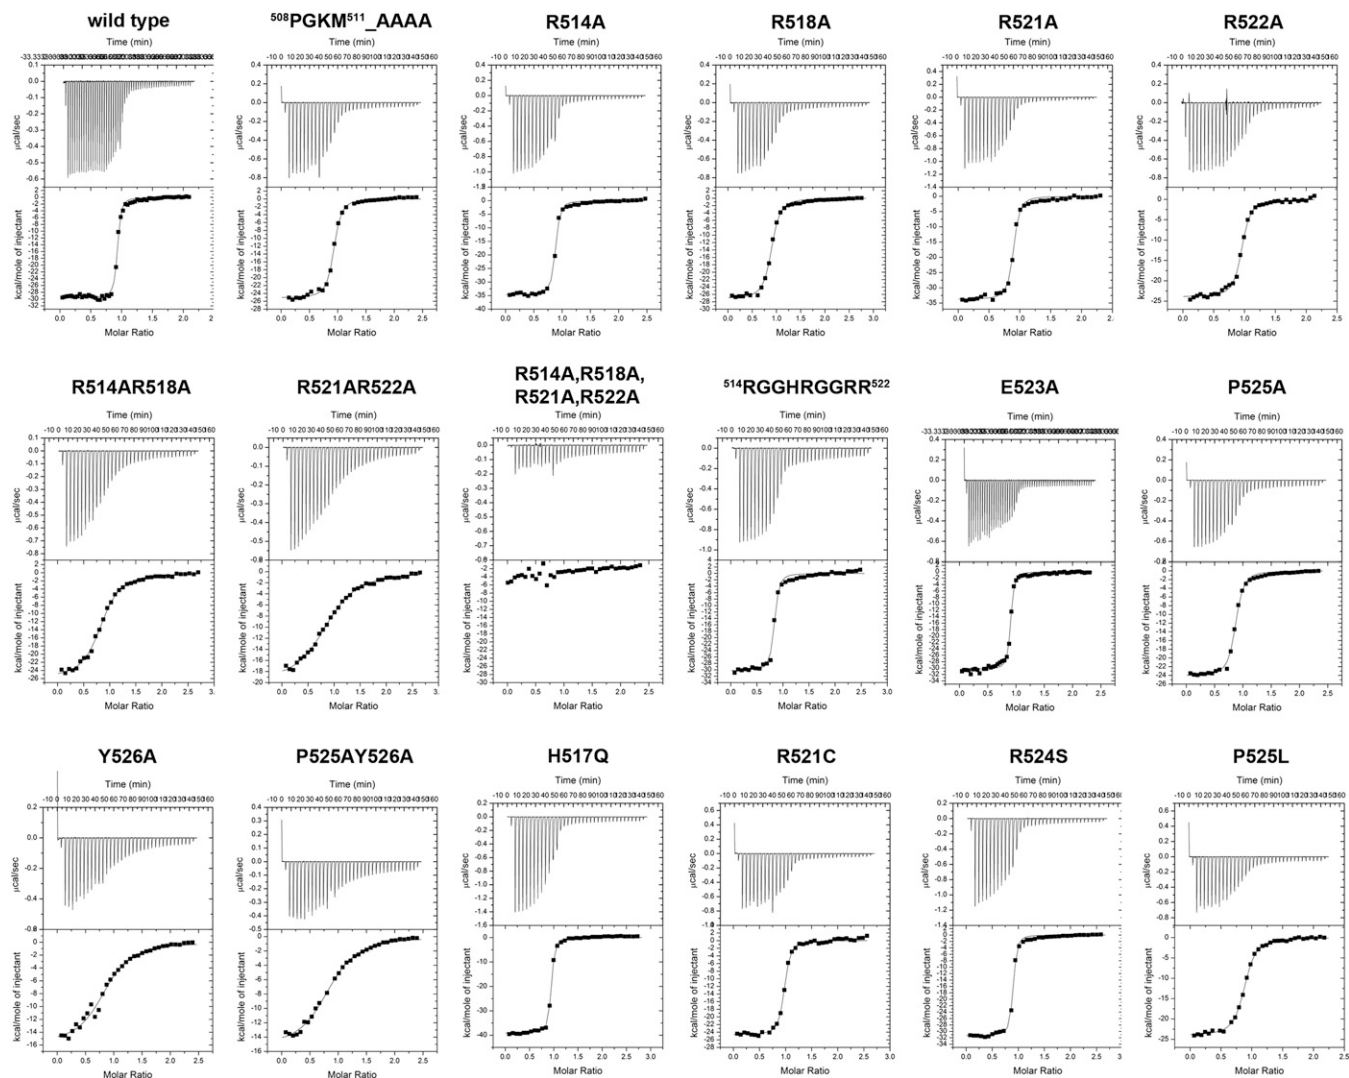

**Fig. S3.** Isothermal titration calorimetry measurements of wild-type and mutant FUS PY-NLSs. About 100  $\mu\text{M}$  of wild-type and mutant MBP-FUS PY-NLS proteins was titrated into the sample cell of a MicroCal Omega VP-ITC calorimeter containing 10  $\mu\text{M}$  full-length Kap $\beta$ 2 at 20  $^{\circ}\text{C}$ . Data were plotted and analyzed using the single binding-site model of the MicroCal Origin software version 7.0. Experiments for wild-type and mutant FUS PY-NLSs were performed in triplicate except for experiments with the  $^{514}\text{RGGHRGRR}^{522}$  mutant, which were performed twice. Representative traces for the wild-type and mutant FUS PY-NLSs are shown.
